# Supplementary material
Source: HighWire-hosted journal article supplement (https://jnm.snmjournals.org/highwire/filestream/99014/field_highwire_adjunct_files/0/228106_Supplemental_Data.pdf)
Supplement: 228106_Supplemental_Data.pdf [file 228106_Supplemental_Data.pdf]

**Supplemental Table 1: Dosimetric data**

|                                         |                       | Training set<br>N = 64 | Testing set<br>N = 23 |
|-----------------------------------------|-----------------------|------------------------|-----------------------|
| Median dose (range)(Gy)                 |                       | 54 (30 - 60)           | 48 (48 - 48)          |
| Median BED (range)(Gy)                  |                       | 150 (45 - 180)         | 105.6 (105.6 - 105.6) |
| Median dose per fraction (range)(Gy)    |                       | 15 (5 - 20)            | 4 (4 - 4)             |
| Median fraction number<br>(range)(Gy)   |                       | 4 (3 - 8)              | 12 (12 - 12)          |
| Median volume (range)(cm <sup>3</sup> ) |                       | 133.3 (8.3 - 946.9)    | 149.7 (5.6 - 987.2)   |
| Treatment units                         |                       |                        |                       |
| Cyberknife                              |                       | 38                     | 0                     |
| Truebeam                                |                       | 18                     | 0                     |
| Truebeam Stx Novalis                    |                       | 8                      | 23                    |
| Number of Fractions                     | Dose/fraction<br>(Gy) |                        |                       |
| 3                                       | < 18                  | 1                      | 0                     |
|                                         | =18                   | 5                      | 0                     |
|                                         | =20                   | 23                     | 0                     |
|                                         | >18 (except 20)       | 1                      | 0                     |
| 4                                       | < 12                  | 0                      | 0                     |
|                                         | =12                   | 17                     | 23                    |
|                                         | >12                   | 5                      | 0                     |
| 5                                       | <10                   | 0                      | 0                     |
|                                         | =10                   | 2                      | 0                     |
|                                         | >10                   | 1                      | 0                     |
| 6                                       | < 9                   | 2                      | 0                     |
|                                         | =9                    | 6                      | 0                     |
|                                         | >9                    | 0                      | 0                     |
| 8                                       | =7,5                  | 1                      | 0                     |

Abbreviations: BED=biological equivalent dose

**Supplemental Table 2: Report on image processing and image biomarker extraction**

| <b>General</b>                 |                                                                                                                                                         |                                            |           |                                                          |           |  |
|--------------------------------|---------------------------------------------------------------------------------------------------------------------------------------------------------|--------------------------------------------|-----------|----------------------------------------------------------|-----------|--|
| Imaging                        | PET, CT                                                                                                                                                 |                                            |           |                                                          |           |  |
| Acquisition and reconstruction | <b>Acquisition parameters</b>                                                                                                                           | <b>Biograph – Siemens (Brest – Nantes)</b> |           | <b>Discovery 690 – General Electric (Tours)</b>          |           |  |
|                                |                                                                                                                                                         | PET                                        | CT        | PET                                                      | CT        |  |
|                                | <b><sup>18</sup>F-FDG activity (MBq)*</b>                                                                                                               | 350–550                                    | –         | 350–550                                                  | –         |  |
|                                | <b>Min/bed position</b>                                                                                                                                 | 2.5                                        | –         | 2                                                        | –         |  |
|                                | <b>Crystal</b>                                                                                                                                          | LSO                                        | –         | LYSO                                                     | –         |  |
|                                | <b>Reconstruction</b>                                                                                                                                   | Iterative                                  | –         | Iterative, TOF Sharp IR                                  | –         |  |
|                                | <b>Matrix (pixels)</b>                                                                                                                                  | 200x200                                    | 512x512   | 256x256                                                  | 512x512   |  |
|                                | <b>Resolution (mm)</b>                                                                                                                                  | 4.07x4.07                                  | 0.98x0.98 | 2.73x2.73                                                | 0.98x0.98 |  |
|                                | <b>Slice thickness (mm)</b>                                                                                                                             | 2.0                                        | 2.0       | 3.27                                                     | 3.27      |  |
|                                | <b>Slices</b>                                                                                                                                           | –                                          | –         | –                                                        | –         |  |
|                                | <b>Voltage (kV)</b>                                                                                                                                     | –                                          | 100       | –                                                        | 140       |  |
|                                | <b>Tube current (mA)</b>                                                                                                                                | –                                          | 95        | –                                                        | 140       |  |
|                                | <b>Reconstruction Method</b>                                                                                                                            | PSF, TOF2i21s                              | –         | VPFXS                                                    | –         |  |
|                                | <b>Correction Applied</b>                                                                                                                               | Norm,dtim,attn,scat,decy,ran               |           | Decy,attn,scat,dtim,ransng,dcal,slsens,norm              |           |  |
|                                | *Administered activity was calculated according to the European Association of Nuclear Medicine (EANM) guidelines 1.0 and, from February 2015, 2.0 [21] |                                            |           |                                                          |           |  |
|                                | <b>Acquisition parameters</b>                                                                                                                           | <b>Ingenuity –Philips (Tours)</b>          |           | <b>Discovery ST – General Electric (Rennes - Nantes)</b> |           |  |
|                                |                                                                                                                                                         | PET                                        | CT        | PET                                                      | CT        |  |
|                                | <b><sup>18</sup>F-FDG activity (MBq)*</b>                                                                                                               | 350–550                                    | –         | 350–550                                                  | –         |  |
|                                | <b>Min/bed position</b>                                                                                                                                 | 2.5                                        | –         | 2                                                        | –         |  |
|                                | <b>Crystal</b>                                                                                                                                          | LSO                                        | –         | LYSO                                                     | –         |  |
|                                | <b>Reconstruction</b>                                                                                                                                   | Iterative                                  | –         | Iterative, TOF Sharp IR                                  | –         |  |
|                                | <b>Matrix (pixels)</b>                                                                                                                                  | 144x144                                    | 512x512   | 128x128                                                  | 512x512   |  |
|                                | <b>Resolution (mm)</b>                                                                                                                                  | 4x4                                        | 0.98x0.98 | 5.5x5.5                                                  | 0.98x0.98 |  |
|                                | <b>Slice thickness (mm)</b>                                                                                                                             | 4                                          | 0.5       | 3.27                                                     | 2.5       |  |
|                                | <b>Slices</b>                                                                                                                                           | –                                          | –         | –                                                        | –         |  |
|                                | <b>Voltage (kV)</b>                                                                                                                                     | –                                          | 140       | –                                                        | 140       |  |
|                                | <b>Tube current (mA)</b>                                                                                                                                | –                                          | 58        | –                                                        | 120       |  |
|                                | <b>Reconstruction</b>                                                                                                                                   | BLOB-OS-TF                                 | –         | 3D IR                                                    | –         |  |
|                                | <b>Correction Applied</b>                                                                                                                               | Decy,radl,attn,scat,dtim,ran,norm,cln      |           | Decy,attn,scat,dtim,ran,dcal,slsens,norm                 |           |  |
| Approach                       | The images were analysed as a volume (3D).                                                                                                              |                                            |           |                                                          |           |  |
| Process structure              | Image acquisition -> reconstruction -> anonymisation -> segmentation -> export -> radiomics analysis -> feature calculation report                      |                                            |           |                                                          |           |  |

|                                          |                                                                                                                                                                                                                   |
|------------------------------------------|-------------------------------------------------------------------------------------------------------------------------------------------------------------------------------------------------------------------|
| Software                                 | MIRAS software V 1.06 (LaTIM INSERM, UMR 1101, Brest, France)                                                                                                                                                     |
| Data availability                        | The datasets generated and/or analysed during the current study are available from the corresponding author on reasonable request for research purposes.                                                          |
| <b>Data conversion</b>                   |                                                                                                                                                                                                                   |
| Procedure                                | None                                                                                                                                                                                                              |
| <b>Image post-acquisition processing</b> |                                                                                                                                                                                                                   |
| Procedure                                | None                                                                                                                                                                                                              |
| <b>Segmentation</b>                      |                                                                                                                                                                                                                   |
| ROI                                      | The volume of interest (VOI) included the primary tumour lesion.                                                                                                                                                  |
| Procedure                                | The ROIs were semi-automatically defined on PET images with the fuzzy locally adaptive Bayesian (FLAB) software, and manually on CT images with MiM Maestro® software.<br>(MiM software Inc Cleveland, OH 44122). |
| <b>Interpolation</b>                     |                                                                                                                                                                                                                   |
| Voxel dimensions                         | None. Original dimensions were kept for all images.                                                                                                                                                               |
| Image interpolation method               | Not applicable                                                                                                                                                                                                    |
| Image intensity rounding                 | Not applicable                                                                                                                                                                                                    |
| ROI interpolation method                 | Not applicable                                                                                                                                                                                                    |
| ROI partial volume                       | Not applicable                                                                                                                                                                                                    |
| <b>Re-segmentation</b>                   |                                                                                                                                                                                                                   |
| ROI mask criteria                        | None                                                                                                                                                                                                              |
| <b>Discretisation</b>                    |                                                                                                                                                                                                                   |
| Discretisation method                    | PET: fixed number of bins, 64 bins<br><br>CT: fixed number of bins, 64 bins                                                                                                                                       |

| Feature calculation |                                                                                                                                                                                                                                                                                                                                                                                                                                                                                                                                                                                                                                                                                                                                                                                                                                                                                                                                                                                        |
|---------------------|----------------------------------------------------------------------------------------------------------------------------------------------------------------------------------------------------------------------------------------------------------------------------------------------------------------------------------------------------------------------------------------------------------------------------------------------------------------------------------------------------------------------------------------------------------------------------------------------------------------------------------------------------------------------------------------------------------------------------------------------------------------------------------------------------------------------------------------------------------------------------------------------------------------------------------------------------------------------------------------|
| Feature set         | <p><b>I.INTENSITY HISTOGRAMM FEATURES</b></p> <p>Minimum</p> <p>Maximum</p> <p>Mean</p> <p>Variance</p> <p>Standard deviation</p> <p>Skewness</p> <p>Kurtosis</p> <p>Energy</p> <p>Entropy</p> <p><b>II.THREE-DIMENSIONAL SHAPE</b></p> <p>Volume</p> <p>Approximate volume</p> <p>3D surface</p> <p>Ration 3D volume</p> <p>Compactness V1</p> <p>Compactness V2</p> <p>Spherical disproportion</p> <p>Sphericity</p> <p>Asphericity</p> <p>Maximun 3D diameter</p> <p>Major axis length</p> <p>Minor axis length</p> <p>Least axis length</p> <p>Elongation</p> <p>Flatness</p> <p><b>III.SECOND ORDER STATISTICS FEATURES DERIVED FROM CO-OCCURRENCE MATRIX AND DIFFERENCE GREY LEVEL MATRIX</b></p> <p><b>A. Co-occurrence matrix (GLCM (Grey Level Co-occurrence Matrix))</b></p> <p>Max co-occurrence</p> <p>Average co-occurrence</p> <p>Variance co-occurrence</p> <p>Entropy co-occurrence</p> <p>Difference Average</p> <p>Difference Variance</p> <p>Difference Entropy</p> |

|  |                                                                                                                                                                                                                                                                                                                                                                                                                                                                                                                                                                                                                                                                                                                                                                                                                                                                                                                                                                                                                                        |
|--|----------------------------------------------------------------------------------------------------------------------------------------------------------------------------------------------------------------------------------------------------------------------------------------------------------------------------------------------------------------------------------------------------------------------------------------------------------------------------------------------------------------------------------------------------------------------------------------------------------------------------------------------------------------------------------------------------------------------------------------------------------------------------------------------------------------------------------------------------------------------------------------------------------------------------------------------------------------------------------------------------------------------------------------|
|  | Sum Average<br>Sum Variance<br>Sum Entropy<br>Angular second moment<br>Contrast<br>Dissimilarity<br>Inverse difference<br>Inverse difference Normalized<br>Inverse difference moment<br>Inverse variance<br>Correlation<br>Autocorrelation<br>Tendency<br>Shade<br>Prominence<br>First Measure of Information Correlation<br>Second Measure of Information Correlation<br><br><b>B. Difference grey level matrix</b><br>Coarseness<br>Contrast<br>Busyness<br>Complexity<br>Strength<br><br><b>IV. TEXTURAL FEATURES DERIVED FROM ZONE SIZE AND ALIGNMENT MATRIX</b><br><br><b>A. Alignment matrix</b><br>Short Run Emphasis<br>Long Run Emphasis<br>Grey-level non-uniformity<br>Run length non-uniformity<br>Run percentage<br>Low Grey Level Run Emphasis<br>High Grey Level Run Emphasis<br>Grey-level non-uniformity normalized<br>Run length non-uniformity normalized<br>Grey-level Variance<br>Run-Length Variance<br><b>B. Zone size matrix</b><br>Small zone emphasis<br>Large Zone Emphasis<br>Low grey level zone emphasis |
|--|----------------------------------------------------------------------------------------------------------------------------------------------------------------------------------------------------------------------------------------------------------------------------------------------------------------------------------------------------------------------------------------------------------------------------------------------------------------------------------------------------------------------------------------------------------------------------------------------------------------------------------------------------------------------------------------------------------------------------------------------------------------------------------------------------------------------------------------------------------------------------------------------------------------------------------------------------------------------------------------------------------------------------------------|

|                    |                                                                                                                                                                                                                                                                                                                                                                                                   |
|--------------------|---------------------------------------------------------------------------------------------------------------------------------------------------------------------------------------------------------------------------------------------------------------------------------------------------------------------------------------------------------------------------------------------------|
|                    | High grey level zone emphasis<br>Small zone low grey level emphasis<br>Small zone high grey level emphasis<br>Large zone low grey level emphasis<br>Large zone high grey level emphasis<br>Grey level non-uniformity<br>Grey level non-uniformity normalized<br>Zone size non-uniformity<br>Zone size entropy<br>Zone size non-uniformity normalized<br>Grey level variance<br>Zone size variance |
| Feature parameters | Texture matrices are built in 3D following the merging strategy (see IBSI reference document).                                                                                                                                                                                                                                                                                                    |
| Standardisation    | Features values have been checked with the most up-to-date consensus of the IBSI benchmark values.                                                                                                                                                                                                                                                                                                |

**Supplemental Table 3: PET and CT features with an AUC > 0.7 in the training set**

| Variable (AUC > 0.7)                                                                              | Hazard ratio | 95% CI    | p value          |
|---------------------------------------------------------------------------------------------------|--------------|-----------|------------------|
| <b><u>Radiomics PET :</u></b>                                                                     |              |           |                  |
| IC2 (AUC 0.83, Se 1.0 - Sp 0.72)                                                                  | undefined    | undefined | <b>0.005</b>     |
| Strength (AUC 0.86, Se 1.0 - Sp 0.72)                                                             | undefined    | undefined | <b>0.001</b>     |
| <b><u>Radiomics CT:</u></b>                                                                       |              |           |                  |
| Flatness (AUC 0.93, Se 1.0 - Sp 0.88)                                                             | undefined    | undefined | <b>&lt;0.001</b> |
| Shade (AUC 0.81, Se 0.75 - Sp 0.88)                                                               | 13.4         | (1.1-168) | <b>0.003</b>     |
| Elongation (AUC 0.79, Se 1.0 - Sp 0.69)                                                           | undefined    | undefined | 0.022            |
| Abbreviations : Se=sensitivity, Sp=specificity, AUC= area under the curve, CI=confidence interval |              |           |                  |

**Supplemental Table 4: Spearman's rank correlation between variables**

| Variables                       | IC2<br>PET | Strength PET | Flatness<br>CT | Shade CT | Elongation CT |
|---------------------------------|------------|--------------|----------------|----------|---------------|
| Age (year)                      | -0.003     | 0.003        | 0.004          | 0.344    | -0.01         |
| Tumor volume (cm <sup>3</sup> ) | -0.585     | -0.636       | -0.009         | -0.032   | 0.215         |
| SUV <sub>max</sub>              | -0.023     | -0.093       | -0.039         | 0.118    | -0.105        |
| IC2 PET                         | 1          | 0.728        | -              | -        | -             |
| Strength PET                    | -          | 1            | -              | -        | -             |
| Flatness CT                     | -          | -            | 1              | 0.296    | 0.636         |
| Shade CT                        | -          | -            | 0.296          | 1        | 0.197         |
| Elongation CT                   | -          | -            | 0.636          | 0.197    | 1             |

**Supplemental Figure 1: Flow chart of patients selection**

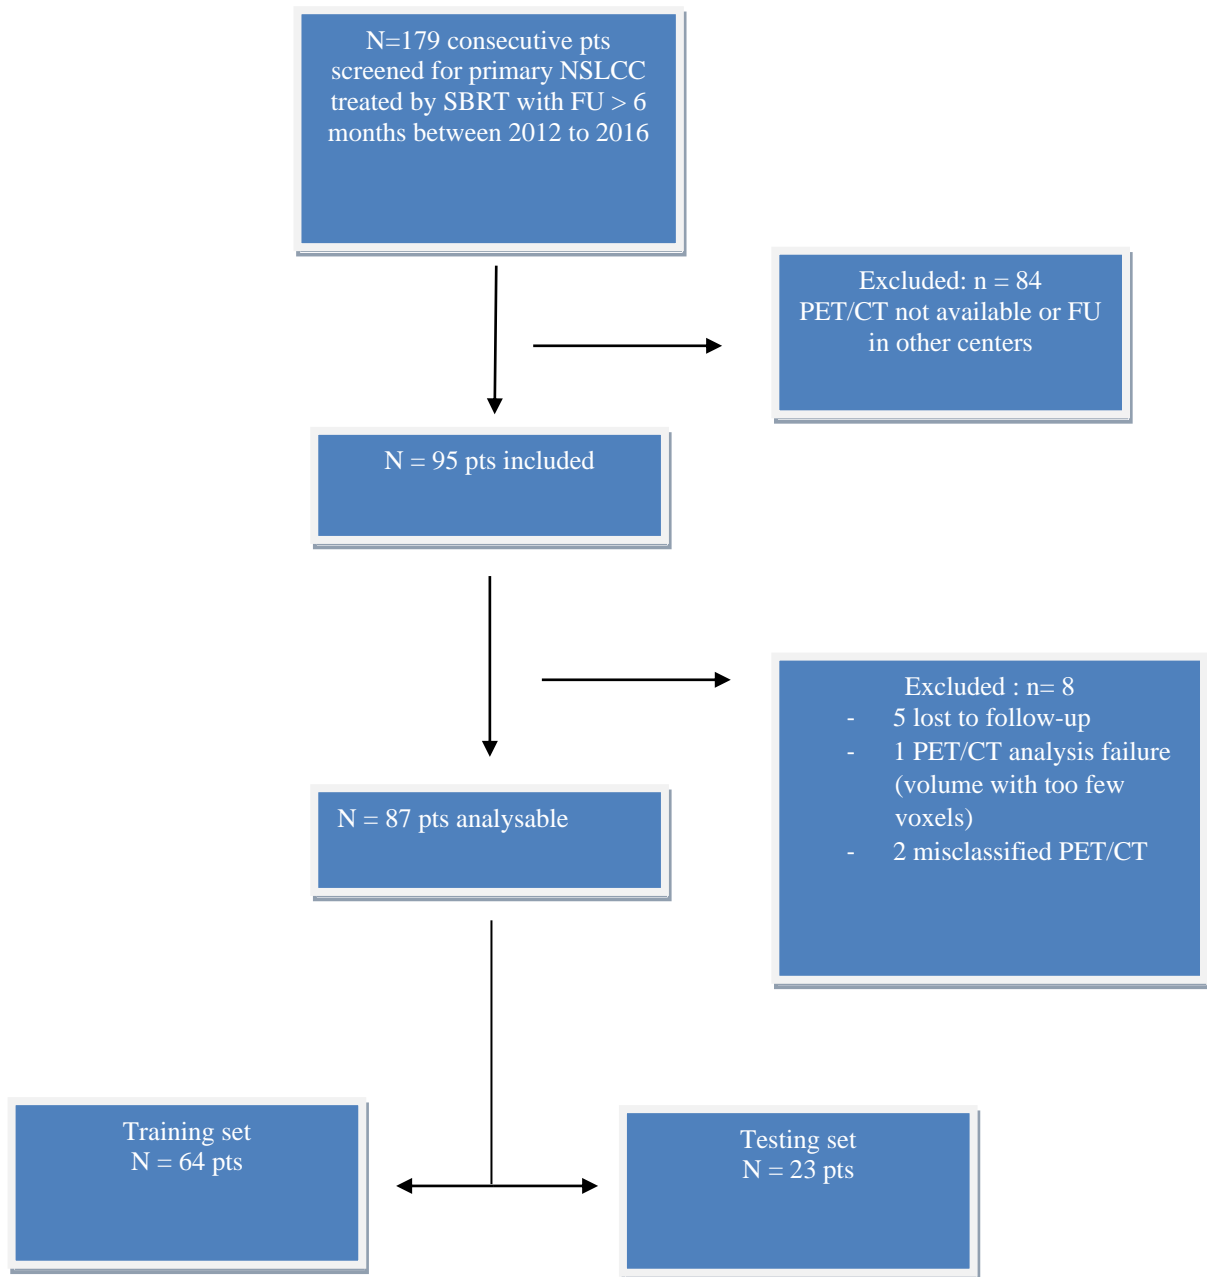



Supplemental Table 5: Patient’s center data

|                           | Brest               | Rennes              | Tours                | Nantes              |
|---------------------------|---------------------|---------------------|----------------------|---------------------|
| Inclusion’s duration      | 8 months            | 52 months           | 50 months            | 46 months           |
| Start – End inclusion     | Apr 2016 – Dec 2016 | Apr 2012 – Aug 2016 | June 2012 – Aug 2016 | Jan 2012 – Nov 2015 |
| Median Follow-up (months) | 15.7 (4 – 23)       | 27 (5 – 58)         | 20 (2 – 63)          | 25 (7 – 58)         |

Supplemental Figure 2: IC2<sub>PET</sub> and Strength<sub>PET</sub> features scatter plot before and after ComBat harmonization according to the different PET/CT systems.

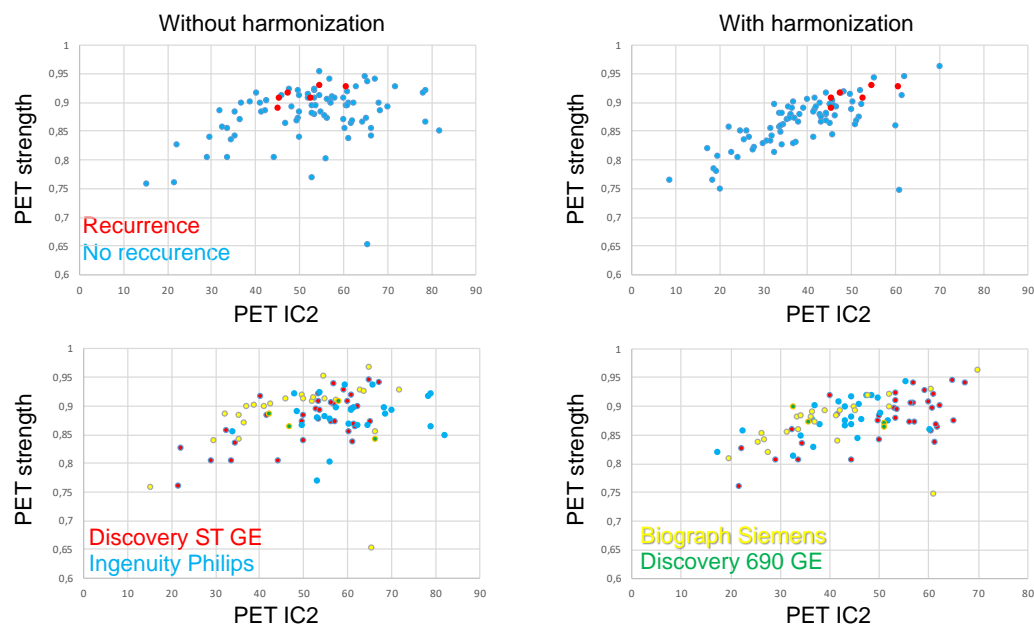

**Supplemental Table 6: Accuracy (sensitivity and specificity) of PET and CT features with and without harmonization in training and testing set**

| Variable |                | Without harmonization           |                                |
|----------|----------------|---------------------------------|--------------------------------|
|          |                | Training set                    | Testing set                    |
| PET      |                |                                 |                                |
|          | IC2            | 0.78 (Se 0.75 - Sp 0.93)        | 0.68 (Se 0.5 - Sp 0.86)        |
|          | Strength       | 0.64 (Se 1.0 - Sp 0.57)         | 0.88 (Se 1.0 - Sp 0.76)        |
|          | IC2 + Strength | <b>0.85 (Se 0.75 - Sp 0.95)</b> | <b>0.95 (Se 1.0 - Sp 0.90)</b> |
| CT       |                |                                 |                                |
|          | Flatness       | 0.93 (Se 0.75 - Sp 1.0)         | 0.50 (Se 0.0 - Sp 1.0)         |
|          | Shade          | 0.77 (Se 1.0 - Sp 0.48)         | 0.80 (Se 1.0 - Sp 0.6)         |
|          | Elongation     | 0.724 (Se 1.0 - Sp 0.60)        | 0.33 (Se 0.0 - Sp 1.0)         |
| PET/CT   |                |                                 |                                |
|          | IC2 + Flatness | 0.75 (Se 0.5 - Sp 0.85)         | 0.5 (Se 0.0 - Sp 1.0)          |
| Variable |                | With harmonization              |                                |
|          |                | Training set                    | Testing set                    |
| PET      |                |                                 |                                |
|          | IC2            | 0.83 (Se 1.0 - Sp 0.72)         | 0.83 (Se 1.0 - Sp 0.67)        |
|          | Strength       | 0.86 (Se 1.0 - Sp 0.72)         | 0.88 (Se 1.0 - Sp 0.76)        |
|          | IC2 + Strength | <b>0.94 (Se 1.0 - Sp 0.88)</b>  | <b>0.91 (Se 1.0 - Sp 0.81)</b> |
| CT       |                |                                 |                                |
|          | Flatness       | 0.93 (Se 1.0 - Sp 0.88)         | 0.40 (Se 0.0 - Sp 0.8)         |
|          | Shade          | 0.81 (Se 0.75 - Sp 0.88)        | 0.40 (Se 0.0 - Sp 1.0)         |
|          | Elongation     | 0.79 (Se 1.0 - Sp 0.69)         | 0.275 (Se 0.0 - Sp 1.0)        |
| PET/CT   |                |                                 |                                |
|          | IC2 + Flatness | 0.98 (Se 1.0 - Sp 0.96)         | 0.45 (Se 0.0 - Sp 1.0)         |

**Supplemental Table 7: Accuracy results for the model combining the two PET features (with cut-off values of 0.89 and 45.11 for IC2 and Strength respectively)**

|                   | Training set            | Testing set             |
|-------------------|-------------------------|-------------------------|
| With histology    | 0.97 (Se 1 and Sp 0.97) | 0.94 (Se 1 and Sp 0.94) |
| Without histology | 0.83 (Se 1 and Sp 0.81) | 1.0 (Se 1 and Sp 1)     |

## Additional details about the ComBat methodology used for harmonization

The Combat harmonization was initially proposed for correcting the so-called “batch effect” in genomic studies (2). ComBat determines an appropriate transformation for each feature through Bayes estimates in the entire feature space, based on the *a priori* “batch” effect observed on feature values. When necessary, the features values are modified so their distribution better match. As a result, most feature values are modified to an arbitrary new reference. This batch label is user defined and in our case it was set as each combination of PET/CT scanner model, acquisition protocol and reconstruction settings (see supplemental table 2). ComBat has been shown to outperform other similar harmonization statistical methods and to be robust for small samples (3). We applied ComBat without accounting for any biological covariate as there was no difference between cohorts in terms of clinical or histopathological parameters. It should be emphasized that ComBat is applied as a pre-processing step to the entire dataset (all features from all 4 centers) before any statistical analysis (correlation, training the models, and testing evaluation) is carried out. ComBat was applied only to radiomic features, not on other clinical variables.

In order to further evaluate (e.g., in a prospective study or in another external testing set) our radiomic model trained and validated on multicentric dataset harmonized with ComBat, the features from the patients of the new cohort should be added to the existing database and harmonized with ComBat. Finally, to use the model clinically on new patients, a similar process can be followed. The new patient radiomic features are added to the database so that the features are transformed and the previously built model can be applied to obtain the prediction for that patient. If the scanner, the acquisition protocol and/or the reconstruction settings are modified for a specific center, then a small sample of patients will have to be collected so to re-harmonize the features with those used for the training/validation of the model.

## REFERENCES:

1. Alex Zwanenburg SL, Martin Vallières, Steffen Löck. Image biomarker standardisation initiative - feature definitions. 2017.
2. Johnson WE, Li C, Rabinovic A. Adjusting batch effects in microarray expression data using empirical Bayes methods. *Biostatistics*. 2007;8:118-127.
3. Chen C, Grennan K, Badner J, et al. Removing batch effects in analysis of expression microarray data: an evaluation of six batch adjustment methods. *PLoS One*. 2011;6:e17238.
4. Vallieres M, Zwanenburg A, Badic B, Cheze Le Rest C, Visvikis D, Hatt M. Responsible Radiomics Research for Faster Clinical Translation. *J Nucl Med*. 2018;59:189-193.
